# Supplementary material for: SubTap, a Versatile 3D Printed Platform for Eavesdropping on Extracellular Interactions
Source: PubMed Central journal article supplement (PMC8422993; doi:10.1128/msystems.00902-21), 2021-08-24

Compound names

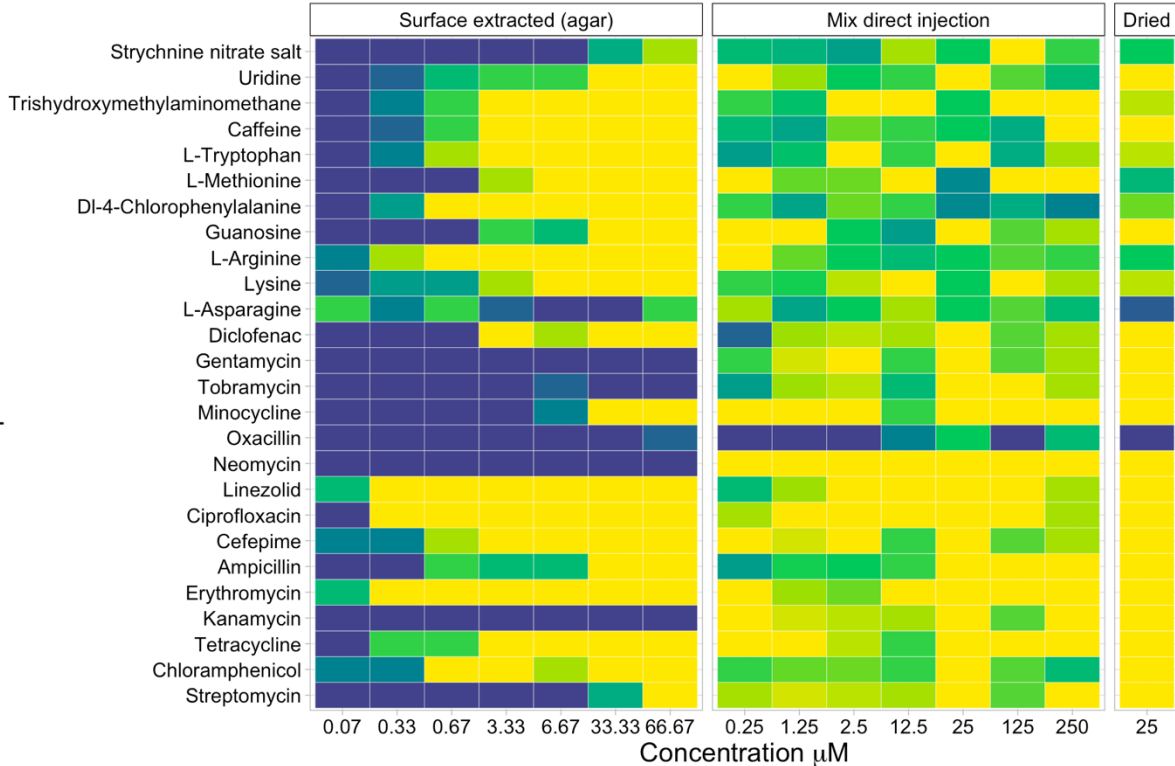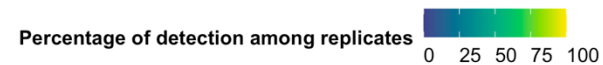

Supplement: msystems.00902-21-sf002.pdf [file msystems.00902-21-sf002.pdf]
