# Supplementary material for: SubTap, a Versatile 3D Printed Platform for Eavesdropping on Extracellular Interactions
Source: PubMed Central journal article supplement (PMC8422993; doi:10.1128/msystems.00902-21), 2021-08-24
Supplement: msystems.00902-21-sf004.pdf [file msystems.00902-21-sf004.pdf]

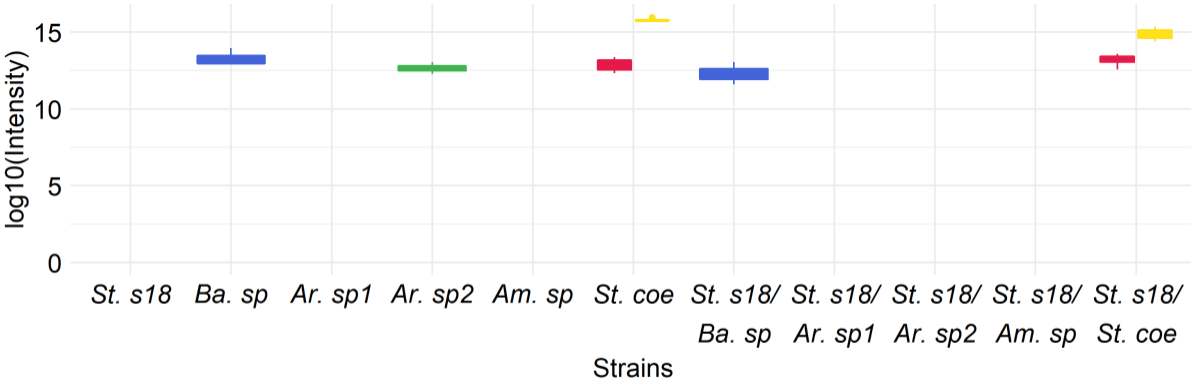

*m/z* ■ 520.3554 Proferrioxamine G1t ■ 585.8075 Desferrioxamine B ■ 588.2619 Desferrioxamine E ■ 601.2948 Coelichelin
