# Supplementary material for: SubTap, a Versatile 3D Printed Platform for Eavesdropping on Extracellular Interactions
Source: PubMed Central journal article supplement (PMC8422993; doi:10.1128/msystems.00902-21), 2021-08-24
Supplement: msystems.00902-21-sf005.pdf [file msystems.00902-21-sf005.pdf]

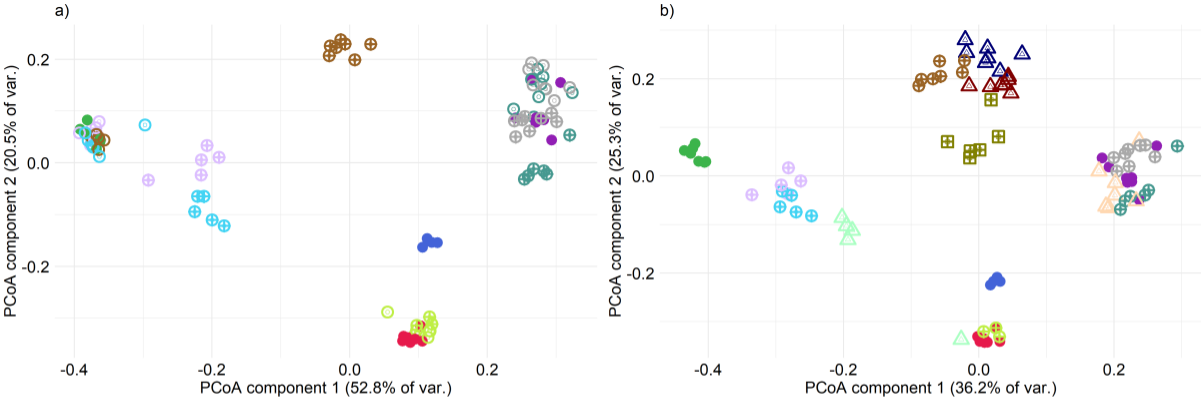

**Type** ● Mono ⊕ Cocu mixed (2) ⊕ Cocu unmixed (2) △ Cocu unmixed (3) ⊞ Cocu unmixed (4)

**Strains**

|   |                                         |   |                      |   |                      |   |                      |   |                             |   |                                   |
|---|-----------------------------------------|---|----------------------|---|----------------------|---|----------------------|---|-----------------------------|---|-----------------------------------|
| ● | <i>Streptomyces s18 (St.s18)</i>        | ⊕ | <i>St.s18/Ba.sp</i>  | ⊕ | <i>Ba.sp/Ar.sp2</i>  | ⊕ | <i>St.coe/Ba.sp</i>  | △ | <i>St.s18/Ba.sp/St.coe</i>  | ⊞ | <i>St.s18/Ba.sp/Ar.sp2/St.coe</i> |
| ● | <i>Bacillus sp.(Ba.sp)</i>              | ⊕ | <i>St.s18/Ba.sp</i>  | ⊕ | <i>Ba.sp/Ar.sp2</i>  | ⊕ | <i>St.coe/Ba.sp</i>  | △ | <i>St.s18/St.coe/Ar.sp2</i> |   |                                   |
| ● | <i>Streptomyces coelicolor (St.coe)</i> | ⊕ | <i>St.s18/Ar.sp2</i> | ⊕ | <i>St.s18/St.coe</i> | ⊕ | <i>St.coe/Ar.sp2</i> | △ | <i>St.s18/Ar.sp2/Ba.sp</i>  |   |                                   |
| ● | <i>Arthrobacter sp2. (Ar.sp2)</i>       | ⊕ | <i>St.s18/Ar.sp2</i> | ⊕ | <i>St.s18/St.coe</i> | ⊕ | <i>St.coe/Ar.sp2</i> | △ | <i>Ar.sp2/Ba.sp/St.coe</i>  |   |                                   |
