# Supplementary material for: SubTap, a Versatile 3D Printed Platform for Eavesdropping on Extracellular Interactions
Source: PubMed Central journal article supplement (PMC8422993; doi:10.1128/msystems.00902-21), 2021-08-24
Supplement: msystems.00902-21-st001.pdf [file msystems.00902-21-st001.pdf]

| Singly-charged         | Doubly-charged      | Triply-charged |
|------------------------|---------------------|----------------|
| M+H                    | M+2H                | M+3H           |
| M+Na                   | M+H+Na              | M+2H+2Na       |
| M+K                    | M+H+NH <sub>4</sub> | M+2Na+H        |
| M+NH <sub>4</sub>      | M+H+K               | M+3Na          |
| M+CH <sub>3</sub> OH+H | M+2Na               |                |
| M+H-H <sub>2</sub> O   |                     |                |
| M+H-2H <sub>2</sub> O  |                     |                |
| M+2Na-H                |                     |                |
| M+2K-H                 |                     |                |
| 2M+H                   |                     |                |
| 2M+Na                  |                     |                |
| 2M+K                   |                     |                |
| 2M+NH <sub>4</sub>     |                     |                |
