# Supplementary material for: SubTap, a Versatile 3D Printed Platform for Eavesdropping on Extracellular Interactions
Source: PubMed Central journal article supplement (PMC8422993; doi:10.1128/msystems.00902-21), 2021-08-24
Supplement: msystems.00902-21-st002.pdf [file msystems.00902-21-st002.pdf]

| Name                     | Molecular formula                                                             | Exact mass | Surface extracted (agar) |       |      |      |      |      |      | Mix direct injection |      |      |      |      |      |      | Mix dried and direct injection |      |
|--------------------------|-------------------------------------------------------------------------------|------------|--------------------------|-------|------|------|------|------|------|----------------------|------|------|------|------|------|------|--------------------------------|------|
|                          |                                                                               |            | Concentration (µM)       |       |      |      |      |      |      |                      |      |      |      |      |      |      |                                |      |
|                          |                                                                               |            | 66.67                    | 33.33 | 6.67 | 3.33 | 0.67 | 0.33 | 0.07 | 250                  | 125  | 25   | 12.5 | 2.5  | 1.25 | 0.25 |                                | 25   |
| Streptomycin             | C <sub>21</sub> H <sub>39</sub> N <sub>7</sub> O <sub>12</sub>                | 581.2657   | 2.29                     | 0.50  | 0.00 | 0.00 | 0.00 | 0.00 | 0.00 | 0.00                 | 1.00 | 0.75 | 1.00 | 0.86 | 0.89 | 0.92 | 0.86                           | 1.00 |
| Chloramphenicol          | C <sub>11</sub> H <sub>12</sub> Cl <sub>2</sub> N <sub>2</sub> O <sub>5</sub> | 322.0123   | 2.00                     | 1.50  | 0.86 | 1.00 | 1.00 | 0.29 | 0.29 | 0.29                 | 0.57 | 0.75 | 1.00 | 0.71 | 0.78 | 0.77 | 0.71                           | 1.00 |
| Tetracycline             | C <sub>22</sub> H <sub>24</sub> N <sub>2</sub> O <sub>8</sub>                 | 444.1533   | 4.00                     | 3.67  | 1.14 | 1.14 | 0.71 | 0.71 | 0.00 | 0.00                 | 1.00 | 1.00 | 1.00 | 0.71 | 0.89 | 1.00 | 1.00                           | 1.00 |
| Kanamycin                | C <sub>18</sub> H <sub>36</sub> N <sub>4</sub> O <sub>11</sub>                | 484.2381   | 0.00                     | 0.00  | 0.00 | 0.00 | 0.00 | 0.00 | 0.00 | 0.00                 | 1.00 | 0.75 | 1.00 | 0.86 | 0.89 | 0.92 | 1.00                           | 1.00 |
| Erythromycin             | C <sub>37</sub> H <sub>67</sub> NO <sub>13</sub>                              | 733.4612   | 4.43                     | 4.17  | 3.29 | 2.43 | 1.86 | 1.71 | 0.86 | 0.86                 | 1.00 | 1.00 | 1.00 | 1.00 | 0.78 | 0.85 | 1.00                           | 1.00 |
| Ampicillin               | C <sub>16</sub> H <sub>19</sub> N <sub>3</sub> O <sub>4</sub> S               | 349.1096   | 3.43                     | 2.67  | 0.86 | 0.86 | 0.71 | 0.00 | 0.00 | 0.00                 | 1.00 | 1.00 | 1.00 | 0.71 | 0.67 | 0.69 | 0.43                           | 1.00 |
| Cefepime                 | C <sub>19</sub> H <sub>24</sub> N <sub>6</sub> O <sub>5</sub> S <sub>2</sub>  | 480.1250   | 3.29                     | 4.00  | 2.86 | 2.57 | 1.43 | 0.29 | 0.29 | 0.29                 | 0.86 | 0.75 | 1.00 | 0.71 | 1.00 | 0.92 | 1.00                           | 1.00 |
| Ciprofloxacin            | C <sub>17</sub> H <sub>18</sub> FN <sub>3</sub> O <sub>3</sub>                | 331.1332   | 2.29                     | 2.17  | 1.71 | 1.14 | 1.00 | 1.00 | 0.00 | 0.00                 | 0.86 | 1.00 | 1.00 | 1.00 | 1.00 | 1.00 | 0.86                           | 1.00 |
| Linezolid                | C <sub>16</sub> H <sub>20</sub> FN <sub>3</sub> O <sub>4</sub>                | 337.1438   | 3.71                     | 4.33  | 2.29 | 2.43 | 1.86 | 1.86 | 0.57 | 0.57                 | 0.86 | 1.00 | 1.00 | 1.00 | 1.00 | 0.85 | 0.57                           | 1.00 |
| Neomycin                 | C <sub>23</sub> H <sub>46</sub> N <sub>6</sub> O <sub>13</sub>                | 614.3123   | 0.00                     | 0.00  | 0.00 | 0.00 | 0.00 | 0.00 | 0.00 | 0.00                 | 1.00 | 1.00 | 1.00 | 1.00 | 1.00 | 1.00 | 1.00                           | 1.00 |
| Oxacillin                | C <sub>19</sub> H <sub>21</sub> N <sub>3</sub> O <sub>5</sub> S               | 403.1202   | 0.14                     | 0.00  | 0.00 | 0.00 | 0.00 | 0.00 | 0.00 | 0.00                 | 0.57 | 0.00 | 0.67 | 0.29 | 0.00 | 0.00 | 0.00                           | 0.00 |
| Minocycline              | C <sub>23</sub> H <sub>27</sub> N <sub>3</sub> O <sub>7</sub>                 | 457.1849   | 2.00                     | 2.00  | 0.29 | 0.00 | 0.00 | 0.00 | 0.00 | 0.00                 | 1.00 | 1.00 | 1.00 | 0.71 | 1.00 | 1.00 | 1.00                           | 1.00 |
| Tobramycin               | C <sub>18</sub> H <sub>37</sub> N <sub>5</sub> O <sub>9</sub>                 | 467.2591   | 0.00                     | 0.00  | 0.14 | 0.00 | 0.00 | 0.00 | 0.00 | 0.00                 | 0.86 | 1.00 | 1.00 | 0.57 | 0.89 | 0.85 | 0.43                           | 1.00 |
| Gentamycin               | C <sub>21</sub> H <sub>43</sub> N <sub>5</sub> O <sub>7</sub>                 | 477.3163   | 0.00                     | 0.00  | 0.00 | 0.00 | 0.00 | 0.00 | 0.00 | 0.00                 | 0.86 | 0.75 | 1.00 | 0.71 | 1.00 | 0.92 | 0.71                           | 1.00 |
| Diclofenac               | C <sub>14</sub> H <sub>11</sub> Cl <sub>2</sub> NO <sub>2</sub>               | 295.0167   | 4.00                     | 3.50  | 1.86 | 1.29 | 0.00 | 0.00 | 0.00 | 0.00                 | 0.86 | 0.75 | 1.00 | 0.86 | 0.89 | 0.85 | 0.14                           | 1.00 |
| L-Asparagine             | C <sub>4</sub> H <sub>8</sub> N <sub>2</sub> O <sub>3</sub>                   | 132.0535   | 0.71                     | 0.00  | 0.00 | 0.14 | 0.71 | 0.29 | 0.71 | 0.71                 | 0.57 | 0.75 | 0.67 | 0.86 | 0.67 | 0.46 | 0.86                           | 0.11 |
| Lysine                   | C <sub>6</sub> H <sub>14</sub> N <sub>2</sub> O <sub>2</sub>                  | 146.1055   | 3.00                     | 2.33  | 1.00 | 0.86 | 0.43 | 0.71 | 0.14 | 0.14                 | 0.86 | 1.00 | 0.67 | 1.00 | 0.89 | 0.69 | 0.71                           | 0.89 |
| L-Arginine               | C <sub>6</sub> H <sub>13</sub> N <sub>4</sub> O <sub>2</sub>                  | 174.1117   | 3.00                     | 2.00  | 1.00 | 1.00 | 1.00 | 0.86 | 0.29 | 0.29                 | 0.71 | 0.75 | 0.67 | 0.57 | 0.67 | 0.77 | 1.00                           | 0.67 |
| Guanosine                | C <sub>10</sub> H <sub>13</sub> N <sub>5</sub> O <sub>5</sub>                 | 283.0917   | 3.00                     | 3.00  | 1.14 | 1.00 | 0.00 | 0.00 | 0.00 | 0.00                 | 0.86 | 0.75 | 1.00 | 0.43 | 0.67 | 1.00 | 1.00                           | 1.00 |
| DL-4-Chlorophenylalanine | C <sub>9</sub> H <sub>10</sub> ClNO <sub>2</sub>                              | 199.0400   | 3.86                     | 3.83  | 2.29 | 2.00 | 1.00 | 0.43 | 0.00 | 0.00                 | 0.29 | 0.50 | 0.33 | 0.71 | 0.78 | 0.46 | 0.71                           | 0.78 |

|                               |                                                               |          |      |      |      |      |      |      |      |      |      |      |      |      |      |      |      |
|-------------------------------|---------------------------------------------------------------|----------|------|------|------|------|------|------|------|------|------|------|------|------|------|------|------|
| L-Methionine                  | C <sub>5</sub> H <sub>11</sub> NO <sub>2</sub> S              | 149.0511 | 3.00 | 3.00 | 1.43 | 1.00 | 0.00 | 0.00 | 0.00 | 1.00 | 1.00 | 0.33 | 1.00 | 0.78 | 0.77 | 1.00 | 0.56 |
| L-Tryptophan                  | C <sub>11</sub> H <sub>12</sub> N <sub>2</sub> O <sub>2</sub> | 204.0899 | 3.86 | 3.83 | 2.86 | 2.71 | 1.14 | 0.29 | 0.00 | 0.86 | 0.50 | 1.00 | 0.71 | 1.00 | 0.62 | 0.43 | 0.89 |
| Caffeine                      | C <sub>8</sub> H <sub>10</sub> N <sub>4</sub> O <sub>2</sub>  | 194.0804 | 2.14 | 1.50 | 1.00 | 1.00 | 0.71 | 0.14 | 0.00 | 1.00 | 0.50 | 0.67 | 0.71 | 0.78 | 0.46 | 0.57 | 1.00 |
| Trihydroxymethyl-aminomethane | C <sub>4</sub> H <sub>11</sub> NO <sub>3</sub>                | 121.0739 | 2.43 | 2.33 | 1.86 | 1.57 | 0.86 | 0.43 | 0.00 | 1.00 | 1.00 | 0.67 | 1.00 | 1.00 | 0.62 | 0.71 | 0.89 |
| Uridine                       | C <sub>9</sub> H <sub>12</sub> N <sub>2</sub> O <sub>6</sub>  | 244.0695 | 2.00 | 2.17 | 1.14 | 1.14 | 0.57 | 0.14 | 0.00 | 0.57 | 0.75 | 1.00 | 0.71 | 0.67 | 0.85 | 1.00 | 1.00 |
| Strychnine nitrate salt       | C <sub>21</sub> H <sub>23</sub> N <sub>3</sub> O <sub>5</sub> | 397.1638 | 0.86 | 0.50 | 0.00 | 0.00 | 0.00 | 0.00 | 0.00 | 0.71 | 1.00 | 0.67 | 0.86 | 0.44 | 0.54 | 0.57 | 0.67 |
