# Supplementary material for: SubTap, a Versatile 3D Printed Platform for Eavesdropping on Extracellular Interactions
Source: PubMed Central journal article supplement (PMC8422993; doi:10.1128/msystems.00902-21), 2021-08-24
Supplement: msystems.00902-21-st003.pdf [file msystems.00902-21-st003.pdf]

| <i>m/z</i> Found | Detected                 | Molecule                                              | Adduct               | MQScore | Shared Peaks |
|------------------|--------------------------|-------------------------------------------------------|----------------------|---------|--------------|
| 147.0450         | St. s18/St. coe          | Glutamate                                             | M+H                  | 0.72    | 6.00         |
| 147.0960         | Am. sp                   | 4-Guanidinobutanoate                                  | M+H                  | 0.84    | 6.00         |
| 153.0430         | Ar. sp1; Ar. sp2         | 6-N-Hydroxylaminopurine                               | M+H                  | 0.83    | 6.00         |
| 154.0590         | Ar. sp2; St. s18/Ar. sp2 | Benzoic acid. 2.3-dihydroxy                           | M+H                  | 0.80    | 6.29         |
| 162.0960         | Ba. sp; St. s18/Ba. sp   | alpha.-Methyl cinnamic acid                           | M+H                  | 0.72    | 6.00         |
| 164.1080         | St. coe; St. s18/St. coe | 3-(2-Hydroxyphenyl)propanoate                         | M+H                  | 0.79    | 6.00         |
| 166.1230         | St. coe                  | L-Ethionine                                           | M+H                  | 0.75    | 6.00         |
| 169.0840         | Ba. sp; St. s18/Ba. sp   | Lupinine                                              | M+H                  | 0.83    | 6.00         |
| 173.1650         | Am. sp; St. s18/Am. sp   | L-Arginine                                            | M+H                  | 0.90    | 6.00         |
| 175.0370         | Ar. sp2; St. s18/Ar. sp2 | L-Arginine                                            | M+H                  | 0.72    | 6.13         |
| 184.9800         | Ar. sp2; St. s18/Ar. sp2 | cyclo-(Ala-4-hydroxy-Pro)                             | M+H                  | 0.74    | 6.00         |
| 189.1070         | Am. sp                   | N.alpha.-Acetyl-L-lysine                              | M+H                  | 0.71    | 6.00         |
| 191.1550         | St. coe                  | alpha.-Cyano-4-hydroxycinnamic acid                   | M+H                  | 0.78    | 6.00         |
| 194.9460         | Ar. sp2                  | 10H-Acridin-9-one                                     | M+H                  | 0.71    | 6.00         |
| 197.1180         | St. coe; St. s18/St. coe | 1-Hydroxyphenazine                                    | M+H                  | 0.75    | 6.25         |
| 201.0550         | St. coe; St. s18/St. coe | Leu-Ser                                               | M+H-H <sub>2</sub> O | 0.83    | 6.00         |
| 205.0510         | Ba. sp; St. s18/Ba. sp   | DL-Thioctamide                                        | M+H                  | 0.71    | 6.00         |
| 206.1140         | Am. sp; St. s18/Am. sp   | 2-(1-hydroxyethyl)-4-(2-hydroxypropyl)-2H-furan-5-one | M+NH <sub>4</sub>    | 0.72    | 6.00         |
| 210.1490         | St. coe; St. s18/St. coe | Kainic Acid                                           | M-H                  | 0.72    | 6.00         |
| 213.0470         | Am. sp                   | Pro-Pro                                               | M+H                  | 0.76    | 6.00         |
| 222.1130         | St. coe; St. s18/St. coe | Zeatin                                                | M+H                  | 0.73    | 6.00         |
| 224.1650         | St. coe                  | Phenazine-1-carboxylic acid                           | M+H                  | 0.75    | 6.00         |
| 226.1450         | St. coe; St. s18/St. coe | L-Carnosine                                           | M+H                  | 0.86    | 6.40         |
| 227.0350         | St. s18/St. coe          | PyroGlu-Pro                                           | M+H                  | 0.78    | 6.00         |
| 234.1360         | St. coe                  | His-Pro                                               | M+H-H <sub>2</sub> O | 0.95    | 9.00         |
| 238.1790         | Ba. sp; St. s18/Ba. sp   | Pyrrolizidine alkaloid A                              | M+H                  | 0.77    | 6.00         |
| 241.1000         | St. coe                  | O-Succinyl-L-homoserine                               | M+Na                 | 0.85    | 6.09         |
| 242.1400         | St. coe                  | Asn-Gln                                               | M+H-NH <sub>3</sub>  | 0.73    | 6.00         |
| 243.1580         | Am. sp                   | PyroGlu-Ile                                           | M+H                  | 0.80    | 7.00         |
| 248.2090         | Ba. sp; St. s18/Ba. sp   | gamma-Glutamylvaline                                  | M+H                  | 0.78    | 6.41         |
| 250.7010         | Am. sp; St. s18/Am. sp   | His-Ile                                               | M+H-H <sub>2</sub> O | 0.79    | 8.32         |
| 252.0620         | St. coe                  | Leu-His                                               | M+H-H <sub>2</sub> O | 0.71    | 8.42         |
| 253.1280         | St. coe                  | Hydroxy-spiceriferone                                 | M+H                  | 0.70    | 7.67         |
| 258.9130         | Ar. sp2                  | Ile-Lys                                               | M+H                  | 0.75    | 9.57         |
| 259.0270         | Am. sp; St. s18/Am. sp   | Ile-Lys                                               | M+H                  | 0.74    | 11.44        |
| 261.1200         | Am. sp                   | Oxolinic Acid                                         | M+H                  | 0.73    | 6.00         |
| 261.1610         | St. coe                  | Flumequine                                            | M+H                  | 0.74    | 6.40         |
| 262.1170         | Ba. sp; St. s18/Ba. sp   | Lys-Ile                                               | M+H <sup>+</sup>     | 0.71    | 10.22        |
| 273.1820         | Ba. sp; St. s18/Ba. sp   | Sotalol                                               | M+H                  | 0.76    | 6.00         |
| 274.0930         | Ba. sp; St. s18/Ba. sp   | Epiandrosterone                                       | M-H <sub>2</sub> O+H | 0.74    | 6.00         |
| 275.0330         | St. coe; St. s18/St. coe | Val-Arg                                               | M+H                  | 0.78    | 7.88         |

| <i>m/z</i> Found | Detected                 | Molecule                                                                                                                             | Adduct                | MQScore | Shared Peaks |
|------------------|--------------------------|--------------------------------------------------------------------------------------------------------------------------------------|-----------------------|---------|--------------|
| 275.0960         | Ba. sp; St. s18/Ba. sp   | Val-Arg                                                                                                                              | M+H                   | 0.71    | 6.00         |
| 277.1560         | St. coe                  | L-Saccharopine                                                                                                                       | M+H                   | 0.72    | 6.40         |
| 281.0800         | St. s18/St. coe          | Dihydrotanshinone I                                                                                                                  | M+H                   | 0.70    | 6.00         |
| 287.0840         | St. coe; St. s18/St. coe | 2-nonenyl-3-hydroxy 4(1H)-quinolone 1 4-hydroxy-2-nonenylquinoline N-oxide                                                           | M+H                   | 0.73    | 8.00         |
| 291.1710         | St. coe                  | 3.7.8-trihydroxy-3-methyl-10-oxo-1.4-dihydropyrano[4.3-b]chromene-9-carboxylic acid                                                  | M-H <sub>2</sub> O+H  | 0.80    | 6.00         |
| 296.1110         | Ba. sp; St. s18/Ba. sp   | Acaranoic acid                                                                                                                       | M+H                   | 0.75    | 6.44         |
| 299.0470         | Ar. sp1; Am. Sp          | S-Adenosyl-L-methionine                                                                                                              | M+H                   | 0.77    | 8.00         |
| 299.0650         | Ba. sp; St. s18/Ba. sp   | Cryptotanshinone                                                                                                                     | M+H                   | 0.73    | 6.25         |
| 302.1030         | St. coe; St. s18/St. coe | Aleuretic Acid                                                                                                                       | M+H                   | 0.74    | 6.00         |
| 305.1030         | St. coe; St. s18/St. coe | Arachidonoyl amide                                                                                                                   | M+H                   | 0.80    | 6.30         |
| 305.1390         | Am. sp                   | 2-Methylene-5-(2.5-Dioxotetrahydrofuran-3-yl)-6-Oxo--10.10-Dimethylbicyclo[7: 2: 0]Undecane                                          | M-H                   | 0.71    | 6.00         |
| 307.0590         | St. coe; St. s18/St. coe | (3S)-8-hydroxy-3-methyl-3.4-dihydro-2H-benzo[a]anthracene-1.7.12-trione                                                              | M+H                   | 0.70    | 6.00         |
| 311.1380         | Ba. sp; St. s18/Ba. sp   | trans-EKODE-(E)-Ib                                                                                                                   | M-H                   | 0.71    | 7.00         |
| 327.0848         | St. coe; St. s18/St. coe | Leuconolam                                                                                                                           | M+H                   | 0.71    | 6.00         |
| 387.1390         | Ba. sp; St. s18/Ba. sp   | (3R.5S.7R.9S.10S.12S.13R.14S.17R)-10.13-dimethyl-17-((R)-6-methylheptan-2-yl)hexadecahydro-1H-cyclopenta[a]phenanthrene-3.7.12-triol | M-2H <sub>2</sub> O+H | 0.74    | 10.46        |
| 429.1540         | Am. Sp                   | Leupeptin                                                                                                                            | M+H                   | 0.71    | 10.00        |
| 520.3550         | St. coe; St. s18/St. coe | Proferrioxamine G1t                                                                                                                  | M+H                   | 0.71    | 13.50        |
| 585.8080         | Ar. sp2                  | Desferrioxamine B + Al (M-2H+Al)                                                                                                     | M+H                   | 0.72    | 15.00        |
| 588.2620         | St. coe; St. s18/St. coe | Coelichelin                                                                                                                          | M+Na                  | 0.83    | 17.76        |
| 601.2950         | Ba. sp; St. s18/Ba. sp   | Desferrioxamine E                                                                                                                    | M+H                   | 0.82    | 17.00        |
| 653.192          | St. coe St. s18/St. coe  | Polysaccharide Agarose x4                                                                                                            | M+Na                  | 0.80    | 14.87        |
