# Supplementary material for: SubTap, a Versatile 3D Printed Platform for Eavesdropping on Extracellular Interactions
Source: PubMed Central journal article supplement (PMC8422993; doi:10.1128/msystems.00902-21), 2021-08-24
Supplement: msystems.00902-21-st004.pdf [file msystems.00902-21-st004.pdf]

| Compound name                                                                                                                                                | m/z Found [M+H] <sup>+</sup> | Mass error (ppm) |
|--------------------------------------------------------------------------------------------------------------------------------------------------------------|------------------------------|------------------|
| 9.10-Octalin                                                                                                                                                 | 137.1324                     | 4.52             |
| Ectoin                                                                                                                                                       | 143.0815                     | 3.85             |
| 6-Methylsalicylic acid                                                                                                                                       | 153.0547                     | 2.63             |
| Allantoin                                                                                                                                                    | 159.0502                     | 10.36            |
| Hydroxyectoine                                                                                                                                               | 159.0764                     | 3.53             |
| Germicidin B                                                                                                                                                 | 183.1015                     | 3.41             |
| Germicidin                                                                                                                                                   | 197.1171                     | 3.04             |
| Kynurenine                                                                                                                                                   | 209.0919                     | 3.65             |
| (R)-3.5-Diethyl-4-hydroxy-5-((E)-2-methylbuta-1.3-dienyl)thiophen-2(5H)-one                                                                                  | 239.1112                     | 2.32             |
| CHEMBL3087384                                                                                                                                                | 253.1407                     | 13.08            |
| CHEMBL1242196                                                                                                                                                | 285.0755                     | 2.90             |
| (S)-DNPA                                                                                                                                                     | 287.0911                     | 2.96             |
| Kalafungin A                                                                                                                                                 | 301.0703                     | 3.16             |
| Dihydrokalafungin                                                                                                                                            | 303.0859                     | 2.92             |
| T3HN                                                                                                                                                         | 305.1017                     | 2.68             |
| Kinobscurinone                                                                                                                                               | 307.0575                     | 10.32            |
| Fluostatin K                                                                                                                                                 | 309.0731                     | 10.53            |
| DHK-OH                                                                                                                                                       | 321.0942                     | 10.20            |
| 3 Methyltetraphene 1.6.7.8.12 pentol                                                                                                                         | 323.0958                     | 11.96            |
| Fluostatin C                                                                                                                                                 | 325.0679                     | 10.14            |
| Cyclic AMP                                                                                                                                                   | 330.0580                     | 6.92             |
| Disaccharide (e.g., Trehalose)                                                                                                                               | 343.1260                     | 5.82             |
| Wailupemycin G                                                                                                                                               | 347.0945                     | 7.30             |
| Coelimycin P1                                                                                                                                                | 349.1211                     | 3.25             |
| Roseoflavin                                                                                                                                                  | 406.1773                     | 11.49            |
| Fluostatin J                                                                                                                                                 | 409.1325                     | 9.19             |
| Fluostatin L                                                                                                                                                 | 437.1637                     | 8.41             |
| 3'-N-Demethyl-4'-hydroxystaurosporine                                                                                                                        | 439.1793                     | 5.27             |
| Granaticin                                                                                                                                                   | 445.1091                     | 9.75             |
| Oxytetracycline                                                                                                                                              | 461.1612                     | 11.24            |
| Brasiliquinone A                                                                                                                                             | 466.1902                     | 7.62             |
| Staurosporine M1                                                                                                                                             | 481.1899                     | 4.70             |
| 3'-N-Acetylholyrine A                                                                                                                                        | 483.2055                     | 4.61             |
| Mycothiols                                                                                                                                                   | 487.1557                     | 8.36             |
| 9-Hydroxyl-3'-N-acetyl-4'-Hydroxylstaurosporine                                                                                                              | 497.1848                     | 4.58             |
| CHEMBL372196                                                                                                                                                 | 561.1362                     | 6.23             |
| Deferoxamine                                                                                                                                                 | 561.3600                     | 2.26             |
| 2-[[2-Amino-5-[formyl(hydroxy)amino]pentanoyl]amino]-5-[[2-[[2-amino-5-[formyl(hydroxy)amino]pentanoyl]amino]-3-hydroxybutanoyl]-hydroxyamino]pentanoic acid | 566.2774                     | 2.21             |
| Difluostatin A                                                                                                                                               | 599.1368                     | 4.37             |
| Nocardamin                                                                                                                                                   | 601.3549                     | 2.06             |
| Tautomycetin                                                                                                                                                 | 607.3418                     | 10.51            |
| gamma-Actinorhodin                                                                                                                                           | 631.1180                     | 14.59            |
| epsilon-Actinorhodin                                                                                                                                         | 649.1286                     | 14.31            |
